# Supplementary material for: ADAM17-mediated EGFR ligand shedding directs macrophage-promoted cancer cell invasion
Source: JCI journal article supplement (doi:10.1172/jci.insight.155296), 2022-08-26

1  
2  
3  
4  
5  
6  
7  
8  
9  
10  
11  
12  
13  
14  
15  
16  
17  
18  
19  
20  
21  
22  
23

**Supplementary figure 1. Proliferation of WT and *Adam17*<sup>-/-</sup> 4T1 and E0771 cells**

A) Relative cell proliferation of WT and *Adam17*<sup>-/-</sup> (A17<sup>-/-</sup>) 4T1 (left) and E0771 (right) cell lines, analyzed over a period of 44h (n=3). Mean and standard deviation indicated. Two-sided, unpaired Student's t-test was applied to test for significant differences.

**Supplementary figure 2. Marker expression in macrophages co-cultured with either WT or *Adam17*<sup>-/-</sup> cells**

A) Relative IL-10, CCR7, IL6, cMyc, CCL2 and iNOS mRNA expression in macrophages co-cultured with WT or *Adam17*<sup>-/-</sup> (A17<sup>-/-</sup>) 4T1 cells, determined by qRT-PCR (n=4).  $\beta_2$  microglobulin (B2M) was used as a housekeeping gene. B) Relative IL-10, CCR7, IL6, cMyc and CCL2 mRNA expression in macrophages co-cultured with WT or *Adam17*<sup>-/-</sup> E0771 cells determined by qRT-PCR (n=4). B2M was used as a housekeeping gene. Mean and standard deviation indicated. Two-sided, unpaired Student's t-test was applied to test for significant differences: \*p $\leq$ 0.05, \*\*p $\leq$ 0.01.

**Supplementary figure 3. Cancer cells educate macrophages towards an invasion promoting phenotype via an ADAM17-dependent soluble factor in several mouse cancer cell lines**

A) *Left*: Protein expression of ADAM17 in WT and *Adam17*<sup>-/-</sup> (A17<sup>-/-</sup>) E0771 cell lines, determined by Western blot (representative of 3 repeats).  $\beta$ -actin was used as a loading control. *Right*: Average amount of invaded cells/field of WT E0771 cell lines together with BMDM educated by WT or *Adam17*<sup>-/-</sup> E0771 cells (n=3). B) *Left*: Protein expression of ADAM17 in WT and *Adam17*<sup>-/-</sup> MC38 cell lines, determined by Western blot (representative of 3 repeats).  $\beta$ -actin was used as a loading control. *Right*: Average amount of invaded cells/field of WT MC38 cell lines together with BMDM

24 educated by WT or *Adam17*<sup>-/-</sup> MC38 cells (n=3). Data were analyzed by one way ANOVA with  
25 Dunnetts multiple comparison test.: \*p≤0.05.

26

27 **Supplementary figure 4. HB-EGF and AREG siRNA efficiency in 4T1 and E0771 cells**

28 A) HB-EGF and B) AREG knock-down efficiency in 4T1 and E0771 measured by qRT-PCR (n=3).  
29 β<sub>2</sub> microglobulin (B2M) was used as a housekeeping gene. Mean and standard deviation indicated.  
30 Data in E were analyzed by one way ANOVA with Dunnetts multiple comparison test.

31

32 **Supplementary figure 5. CXCL1 expression upon CSF-1 and HB-EGF treatment**

33 A) CXCL1 mRNA expression in BMDM upon CSF-1, HB-EGF and CSF-1 and HB-EGF treatment  
34 (n=3). Data in E were analyzed by one way ANOVA with Dunnetts multiple comparison test.

Supplementary figure 1

A)

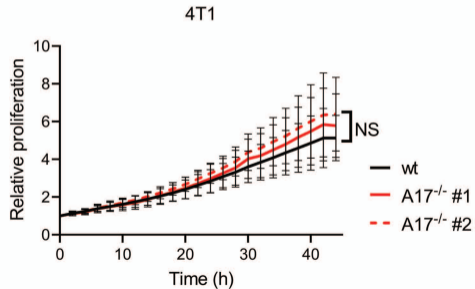

B)

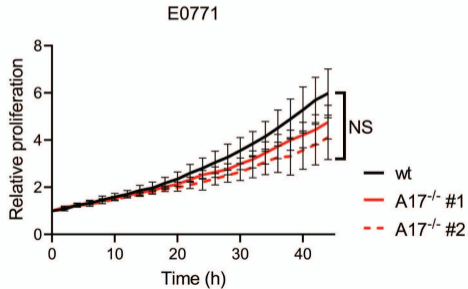

Supplementary figure 2

A)

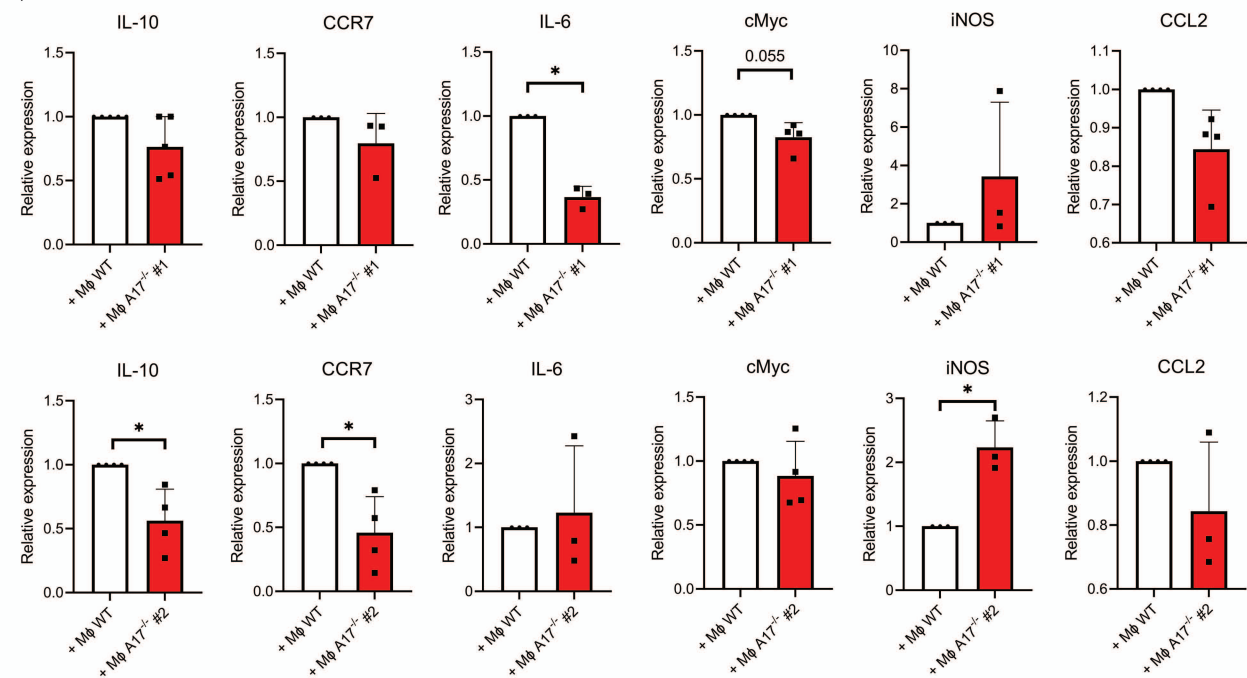

B)

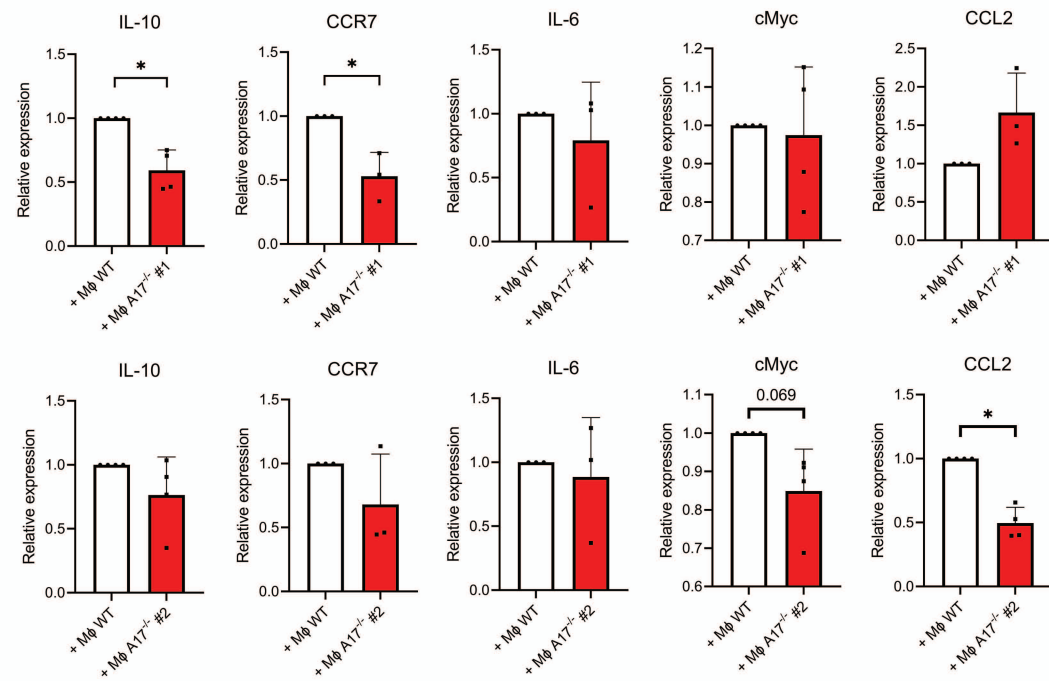

# Supplementary figure 3

A)

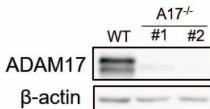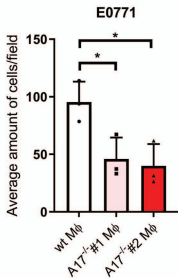

B)

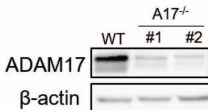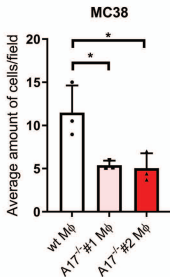

# Supplementary figure 4

A)

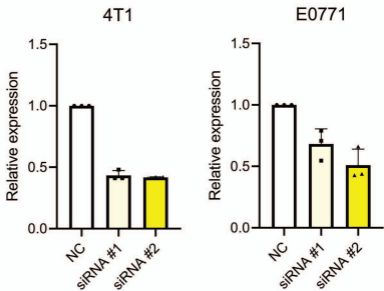

B)

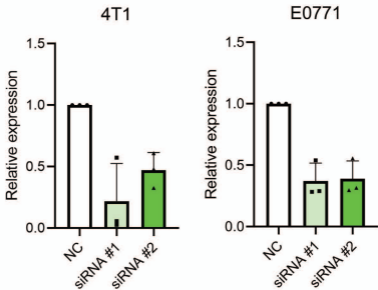

# Supplementary figure 5

A) CXCL1

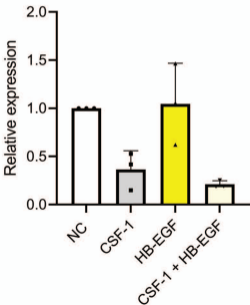

Supplement: sd1 [file 1]
