# Supplementary material for: ADAM17-mediated EGFR ligand shedding directs macrophage-promoted cancer cell invasion
Source: JCI journal article supplement (doi:10.1172/jci.insight.155296), 2022-08-26
Supplement: sd1 [file 1]

You are being redirected.
